# Supplementary material for: Herpes Simplex Virus Type 2 Immediate Early Protein ICP27 Inhibits IFN-β Production in Mucosal Epithelial Cells by Antagonizing IRF3 Activation
Source: Front Immunol. 2019 Feb 26;10:290. doi: 10.3389/fimmu.2019.00290 (PMC6399465; doi:10.3389/fimmu.2019.00290)
Supplement: Supplementary file 1 [file Table_1.doc]

Supplementary Material

**Herpes simplex virus type 2 immediate early protein ICP27 inhibits IFN- production in mucosal epithelial cells by antagonizing IRF3 activation**

**Xinmeng Guan1,2, Mudan Zhang3, Ming Fu1,2, Sukun Luo4, Qinxue Hu1,5**

1 State Key Laboratory of Virology, Wuhan Institute of Virology, Chinese Academy of Sciences, Wuhan, China

2 University of Chinese Academy of Sciences, Beijing, China

3The Joint Center of Translational Precision Medicine, Guangzhou Institute of Pediatrics, Guangzhou Women and Children’s Medical Center, Wuhan Institute of Virology, Chinese Academy of Science, Wuhan, China,

4Wuhan Children's Hospital (Wuhan Maternal and Child Healthcare Hospital, Tongji Medical College, Huazhong University of Science & Technology, Wuhan, China

5Institute for Infection and Immunity, St George’s University of London, London, UK

*** Correspondence:**Dr. Qinxue Hu: [qhu@wh.iov.cn](mailto:qhu@wh.iov.cn); Dr. Mudan Zhang: [mudan@wh.iov.cn](mailto:mudan@wh.iov.cn)

# Supplementary Table.1. Primers used in the study

| ICP27-Flag-F | GGCCAAGCTTATGGATTACAAGGATGACGACGATAAGGCTACCGACATTGATATGCT |
| --- | --- |
| ICP27-HA-F | GAATTAGGATCCATGTACCCATACGACGTCCCAGACTACGCTGCTACCGACATTGATA |
| ICP27-Flag-F | GGCCAAGCTTATGGATTACAAGGATGACGACGATAAGGCTACCGACATTGATATGCT |
| ICP271-138aa-R | TATAGGATCCCTATCGGGGATGCGGTGCCTTG |
| ICP271-152aa-R | AATTAAGGATCCCTAGCCGTATCGACCCCGGCCCC |
| ICP271-302aa-R | TTAAGGATCCCTACCCCCCCGCTTGGGTGG |
| ICP27-R | TATAGGATCCCTAAAATAGGGAGTTGCAGTAGAA |
| *ifnb*-F | CAAATTGCTCTCCTGTTGTGCTTC |
| *ifnb*-R | AATGCGGCGTCCTCCTTCT |
| *gapdh*-F | GGGAAGCTCACTGGCATGG |
| *gapdh*-R | TTACTCCTTGGAGGCCATGT |
| *ifit1-*F | CCTCCTTGGGTTCGTCTACA |
| *ifit1-*R | GGCTGATATCTGGGTGCCTA |
| *isg15-*F | GAGAGGCAGCGAACTCATCTT |
| *isg15-*R | CCAGCATCTTCACCGTCAGG |
| *cxcl10-*F | GCTCTACTGAGGTGCTATGTTC |
| *cxcl10-*R | GGAGGATGGCAGTGGAAGTC |
| Neg-sense | UUC UCC GAA CGU GUC ACG UTT |
| Neg-anti | ACG UGA CAC GUU CGG AGA ATT |
| ICP27 siRNA1-sense | GCG UGU CGG AGA UCG ACU ATT |
| ICP27 siRNA1-anti | UAG UCG AUC UCC GAC ACG CCG |
| ICP27 siRNA2-sense | GGC GGG UCU CAU UGA AAU ATT |
| ICP27 siRNA2-anti | UAU UUC AAU GAG ACC CGC CAT |

# Supplementary Figures


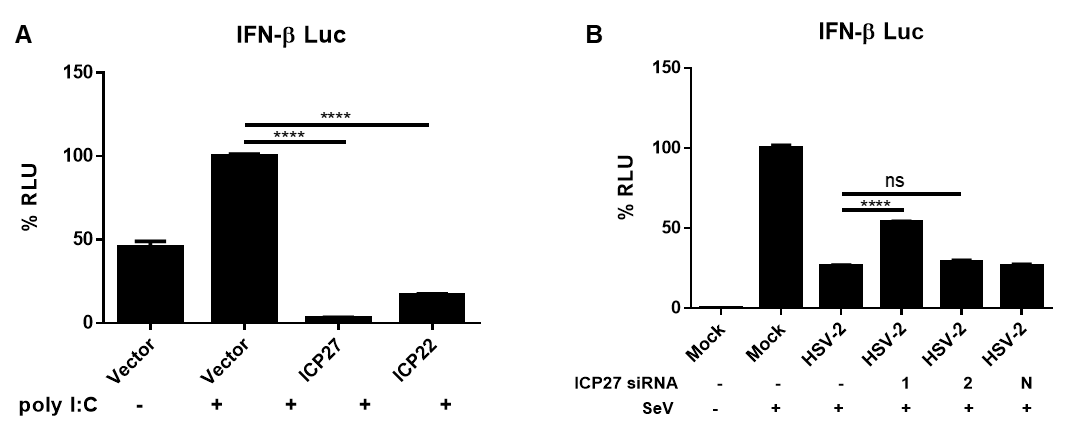


**Supplementary Figure 1.** **HSV-2 ICP27 inhibits IFN-β induction in ME180 cells. (A)** HSV-2 inhibits the Poly(I:C)-induced activation of IFN-β promoter. ME180 cells were seeded in 6-well plates and co-transfected with empty vector pcDNA3.1(+), plasmid expressing HSV-2 ICP27 or ICP22, together with the reporter plasmid p125-Luc and the internal control phRL-TK. At 24 h post-transfection, cells were transfected with 2 µg/well Poly(I:C) or mock-transfected for 16 h, and lysed for DLR assay. Data shown are mean ± SD of three independent experiments. ****P<0.0001. **(B)** Knockdown of ICP27 reduces the capability of HSV-2 in inhibiting IFN-β promoter activation. ME180 cells were seeded in 6-well plates and co-transfected with HSV-2 ICP27 siRNA-1, siRNA-2, or negative control siRNA (N), together with the reporter plasmid p125-Luc and the internal control phRL-TK. At 4 h post-transfection, cells were infected with HSV-2 at an MOI of 0.5 or mock-infected. At 20 h.p.i, cells were stimulated with or without 100 HAU ml-1 SeV for 16 h, and lysed for DLR assay. The data shown are representative of three independent experiments, with each condition performed in triplicate (mean ± SD). ****P<0.0001.


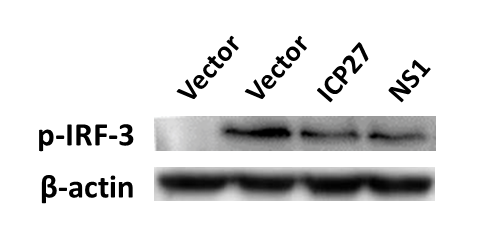


**Supplementary Figure 2. HSV-2 ICP27 inhibits IRF3 phosphorylation.** HEK 293T cells were seeded in 6-well plates and transfected with pcDNA3.1(+), plasmid expressing HSV-2 ICP27 or influenza virus NS1. At 24 h post-transfection, cells were stimulated with or without 100 HAU ml-1 SeV for 16 h. Cells were lysed and phosphorylated IRF3 was detected with a p-IRF3 mAb.


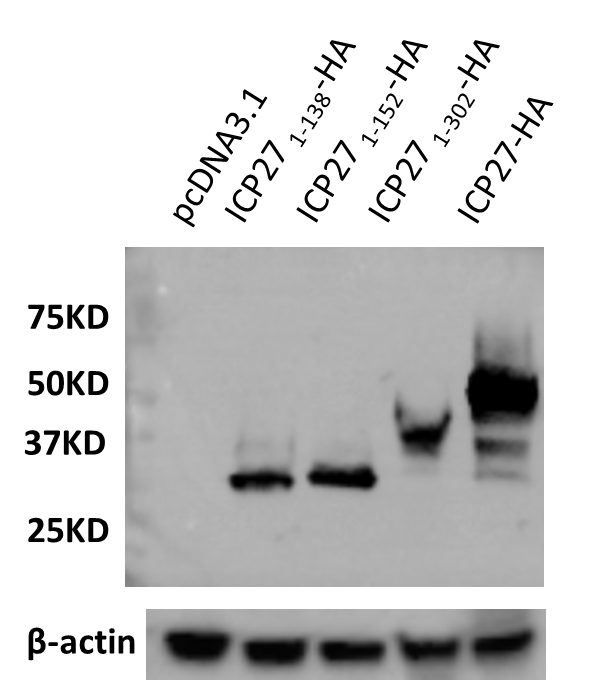


**Supplementary Figure 3.** The expression of HSV-2 ICP27 mutants. HEK 293T cells were transfected with empty vector pcDNA3.1(+), truncated or full-length HSV-2 ICP27 expression plasmid, followed by stimulation with or without 100 HAU ml-1 SeV for 16 h, and cells were lysed for Western Blot.
